# Supplementary material for: Geometric landscapes for material discovery within energy–structure–function maps
Source: Royal Society of Chemistry journal article supplement (doi:10.1039/d0sc00049c), 2020-01-01
Supplement: d0sc00049c1.pdf [file d0sc00049c1.pdf]

## Supplementary information

Seyed Mohamad Moosavi,<sup>†,¶</sup> Henglu Xu,<sup>†,¶</sup> Linjiang Chen,<sup>‡</sup> Andrew I. Cooper,<sup>‡</sup>  
and Berend Smit<sup>\*,†</sup>

<sup>†</sup>*Laboratory of Molecular Simulation (LSMO), Institut des Sciences et Ingénierie  
Chimiques, École Polytechnique Fédérale de Lausanne (EPFL), Rue de l'Industrie 17,  
CH-1951 Sion, Valais, Switzerland*

<sup>‡</sup>*Leverhulme Research Centre for Functional Materials Design, Materials Innovation  
Factory and Department of Chemistry, University of Liverpool, 51 Oxford Street, Liverpool,  
L7 3NY, UK.*

<sup>¶</sup>*These authors contributed equally to this work*

E-mail: berend.smit@epfl.ch

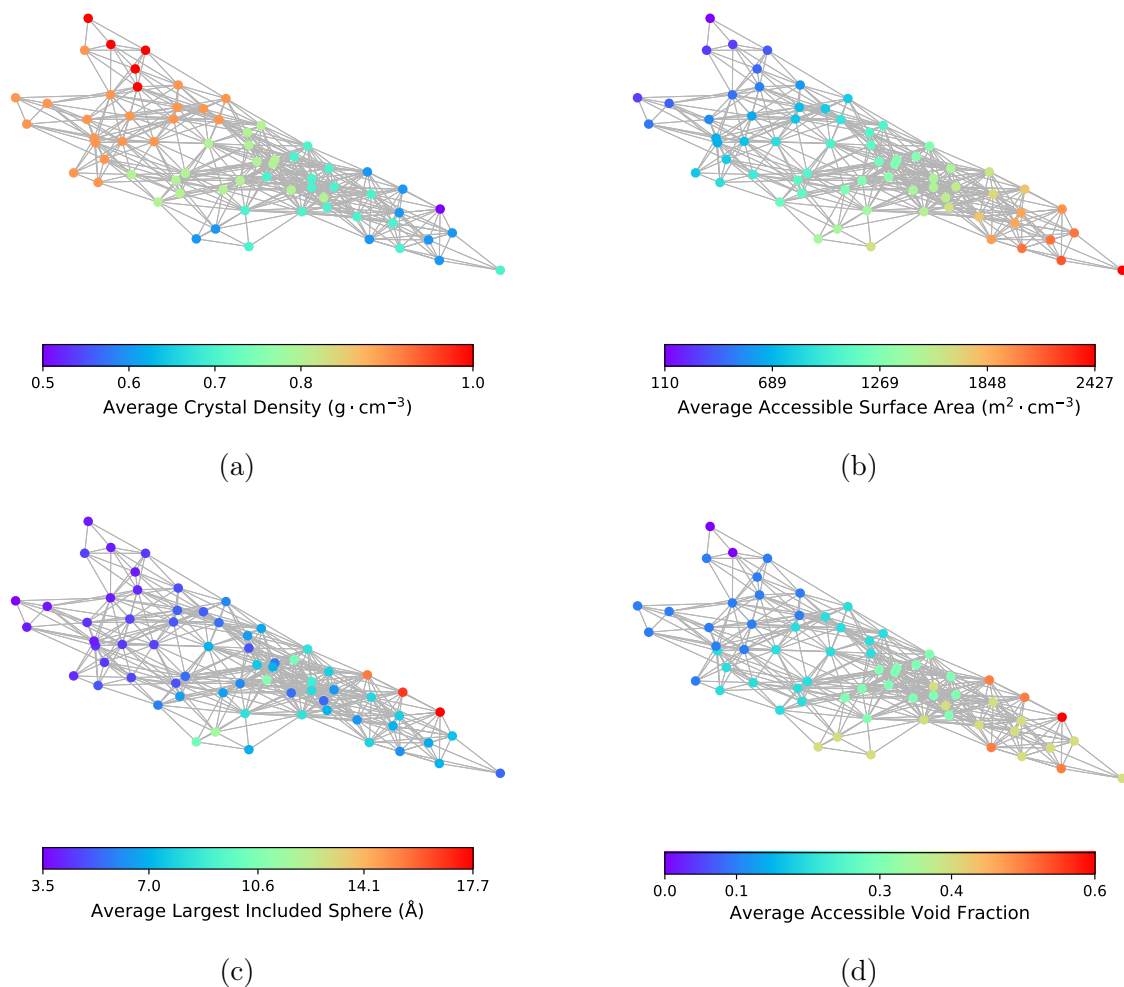

Supplementary Figure 1: The geometric landscape of **T0** molecule. The color coding shows the average conventional geometric descriptors, (a) crystal density, (b) accessible surface area, (c) largest included sphere, and (d) void fraction, respectively.

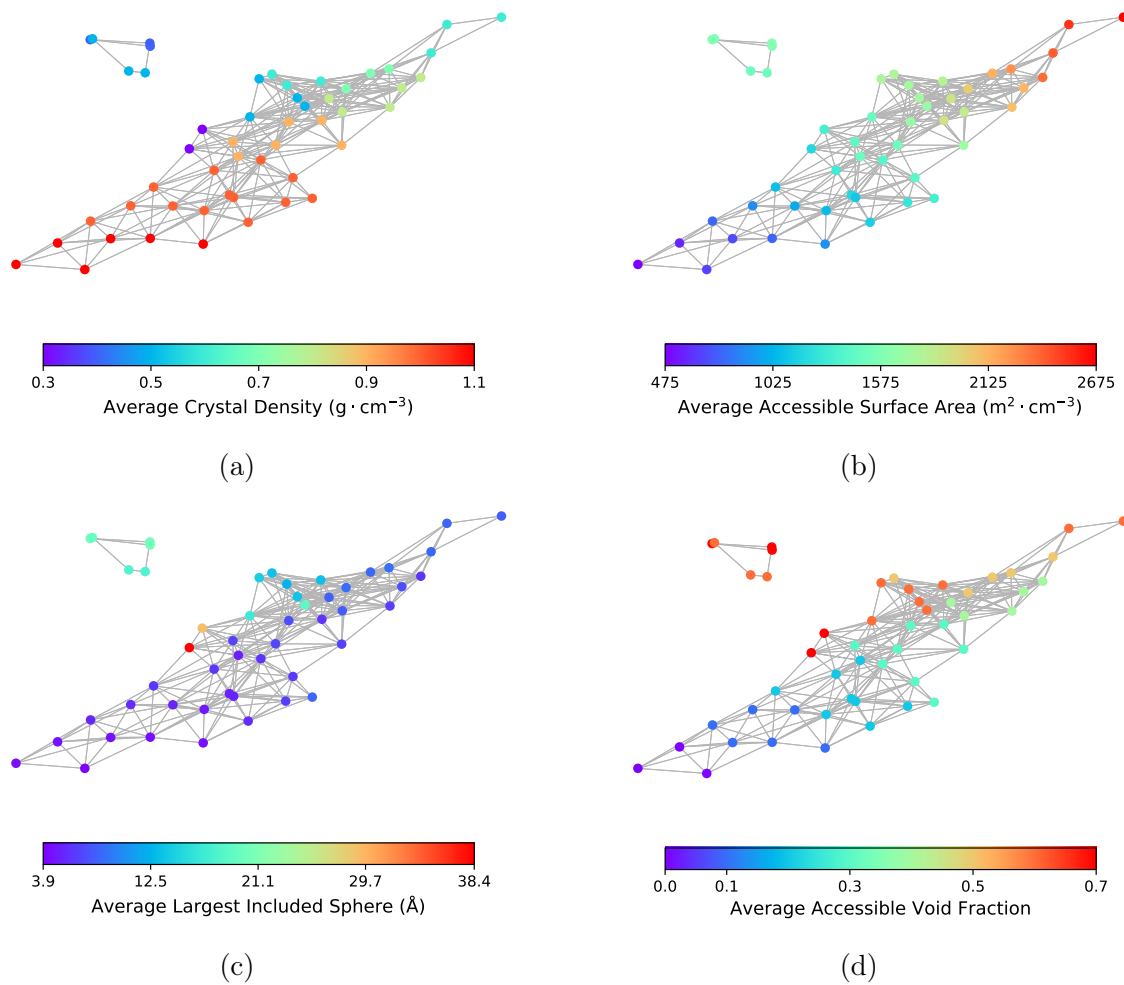

Supplementary Figure 2: The geometric landscape of **P2** molecule. The color coding shows the average conventional geometric descriptors, (a) crystal density, (b) accessible surface area, (c) largest included sphere, and (d) void fraction, respectively.

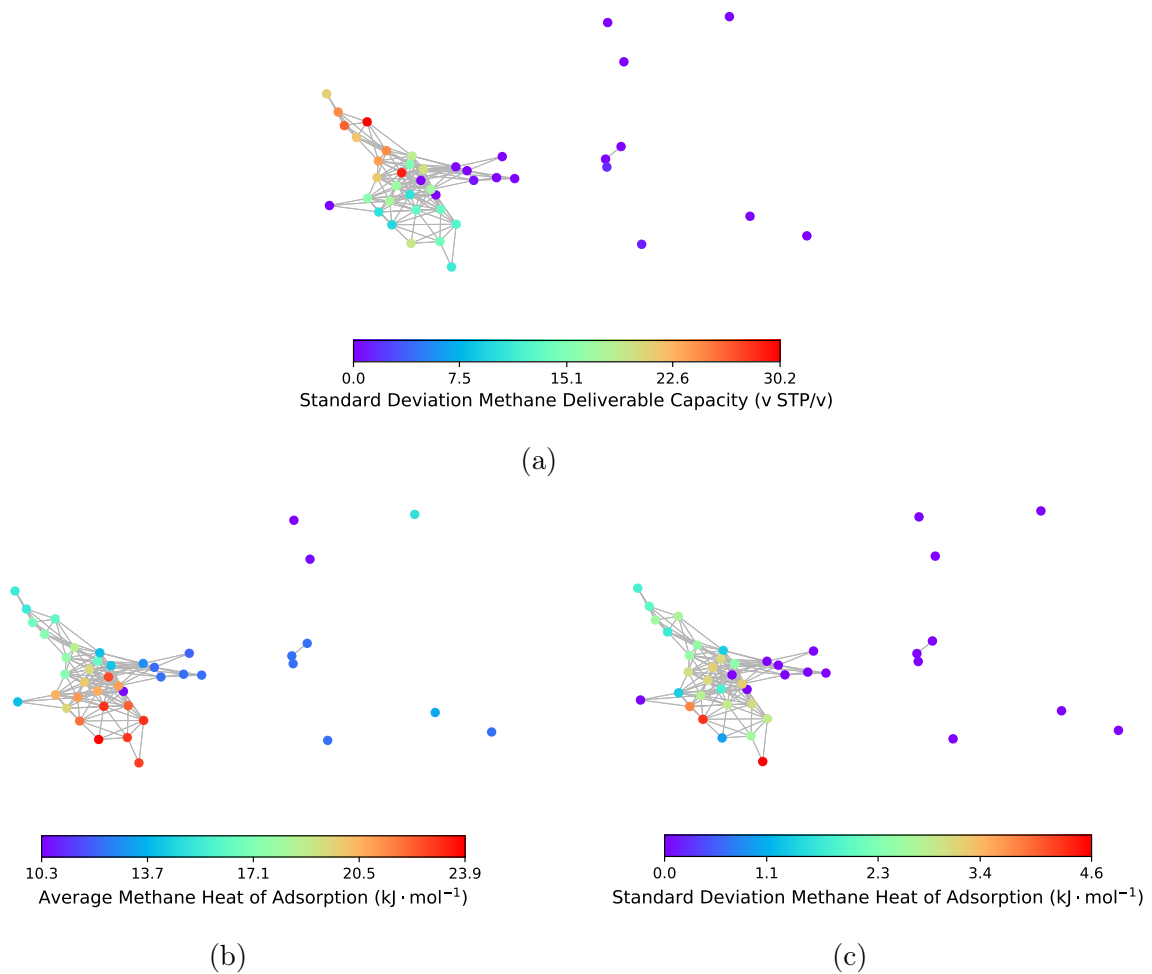

Supplementary Figure 3: The correlation between geometry and function for methane storage application for **T2** molecule. Low standard deviation in each bin of the geometric landscape shows the extend of importance of pore geometry for this application.

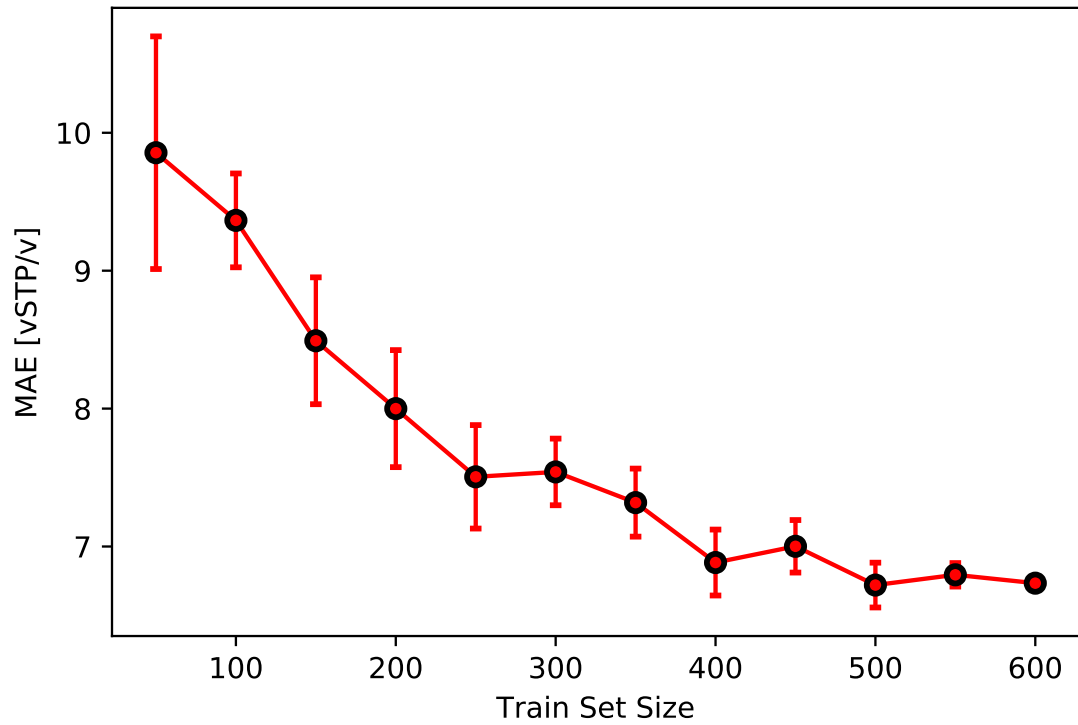

Supplementary Figure 4: Learning curve of the machine learning model. The mean absolute errors (MAE) were computed 10 times each with a unique random seed for each train set size. Error bars show the standard deviations.
